# Supplementary material for: Genome-wide analysis of the CalS gene family in cotton reveals their potential roles in fiber development and responses to stress
Source: PeerJ. 2021 Nov 30;9:e12557. doi: 10.7717/peerj.12557 (PMC8641485; doi:10.7717/peerj.12557)
Supplement: Supplemental Information 1 [file peerj-09-12557-s001.xlsx]

## Sheet: Sheet1
Primer name	Sequence (5' to 3')	Used to
GhCalS2-F	ACGTACTTGTGAGCAGGCATA	analyse the relative transcript levels of cotton CalS genes by (q)RT-PCR
GhCalS2-R	ATCTATTCGGCCACCATCCC
GhCalS3-F	CCAGTTGGGTATTGCTAATGGC
GhCalS3-R	GACCAGGAACTGAACCATCCG
GhCalS4-F	GGCATCCTGCTATGGACCTC
GhCalS4-R	TACGAAGTACACCGGCATCG
GhCalS6-F	TTCGGAAGCAAACCGAAGGAT
GhCalS6-R	AGACCACGTCCAACGAAAGT
GhCalS9-F	GCTGTTATGTCTGTTCGGATAAC
GhCalS9-R	GTTCGAATCTCTCCAAGGCG
GhCalS16-F	CATGGAGAAAGTGGCTCTGTG
GhCalS16-R	GGCCAGCTCAATTCAAAGCA
β-Actin-F	ATCCTCCGTCTTGACCTTG
β-Actin-R	TGTCCGTCAGGCAACTCAT
