# Supplementary material for: Genome-wide analysis of the CalS gene family in cotton reveals their potential roles in fiber development and responses to stress
Source: PeerJ. 2021 Nov 30;9:e12557. doi: 10.7717/peerj.12557 (PMC8641485; doi:10.7717/peerj.12557)
Supplement: Supplemental Information 2 [file peerj-09-12557-s002.xlsx]

## Sheet: Sheet1
Table S2.List of the identified CalS genes in cotton
ID	Cotton Identfier	Physical position on cotton genome	Protein length (aa)	pI	Molecular weight (Da)	CDS（bp）	CDS（number）	Predicted Subcelluar Location	Duplicate type
GaCalS1	evm.model.Ga01G2023	Chr01:96588189-96616501-	1898	8.67	218078	5697	51	PlasmaMembrane	Dispersed
GaCalS2	evm.model.Ga03G0368	Chr03:4117620-4122765+	1671	8.79	196212	5016	3	PlasmaMembrane	Tandem
GaCalS3	evm.model.Ga03G0369	Chr03:4130370-4140328+	1710	8.31	200744	5133	3	PlasmaMembrane	Tandem
GaCalS4	evm.model.Ga03G0373	Chr03:4158125-4163284-	1719	8.72	201302	5160	1	PlasmaMembrane	Proximal
GaCalS5	evm.model.Ga04G0470	Chr04:6468985-6474285+	1766	9.03	205548	5301	1	PlasmaMembrane	WGD or Segmental
GaCalS6	evm.model.Ga04G1728	Chr04:92361053-92388808-	1943	8.73	226412	5832	44	PlasmaMembrane	Dispersed
GaCalS7	evm.model.Ga05G1727	Chr05:15590462-15595987-	1778	9.08	206030	5337	2	PlasmaMembrane	WGD or Segmental
GaCalS8	evm.model.Ga08G0187	Chr08:1445489-1483404-	1899	8.55	218661	5700	51	PlasmaMembrane	Dispersed
GaCalS9	evm.model.Ga08G0912	Chr08:19321880-19342524+	1951	9.24	225775	5856	42	PlasmaMembrane	Tandem
GaCalS10	evm.model.Ga08G0913	Chr08:19616919-19656927+	1951	9.07	225912	5856	42	PlasmaMembrane	Tandem
GaCalS11	evm.model.Ga10G1892	Chr10:104808687-104819826+	1914	9.09	219688	5745	42	PlasmaMembrane	Proximal
GaCalS12	evm.model.Ga10G1896	Chr10:104892366-104908077-	1927	8.93	221415	5784	42	PlasmaMembrane	Proximal
GaCalS13	evm.model.Ga10G1973	Chr10:107495579-107517583+	1979	8.81	229745	5940	43	PlasmaMembrane	Dispersed
GaCalS14	evm.model.Ga11G0483	Chr11:6521724-6538732-	1957	8.73	226403	5874	41	PlasmaMembrane	Dispersed
GaCalS15	evm.model.Ga13G0773	Chr13:12613904-12619183-	1759	9.06	204639	5280	1	PlasmaMembrane	WGD or Segmental
GaCalS16	evm.model.Ga14G1699	tig00015727:119731-134834-	1695	9.07	196869	5088	37	PlasmaMembrane	Dispersed
GbCalS1	GB_A02G0328	A02:3649301-3654091+	1550	8.74	182378	4653	3	PlasmaMembrane	WGD or Segmental
GbCalS2	GB_A02G0329	A02:3661831-3667099+	1543	7.98	181082	4632	5	PlasmaMembrane	Tandem
GbCalS3	GB_A03G0754	A03:15101632-15130035+	1898	8.71	218017	5697	51	PlasmaMembrane	WGD or Segmental
GbCalS4	GB_A03G1872	A03:99983128-99988440-	1770	9.07	206445	5313	1	PlasmaMembrane	WGD or Segmental
GbCalS5	GB_A04G1289	A04:75468055-75473355-	1766	9.05	205484	5301	1	PlasmaMembrane	WGD or Segmental
GbCalS6	GB_A04G1819	A04:81892617-81907789+	1700	9.03	197223	5103	37	PlasmaMembrane	WGD or Segmental
GbCalS7	GB_A05G1645	A05:15693502-15699027-	1778	9.12	206028	5337	2	PlasmaMembrane	WGD or Segmental
GbCalS8	GB_A05G4093	A05:101835336-101862869-	1915	8.81	223014	5748	42	PlasmaMembrane	WGD or Segmental
GbCalS9	GB_A08G0158	A08:1295138-1333173-	1899	8.49	218666	5700	51	PlasmaMembrane	WGD or Segmental
GbCalS10	GB_A08G0873	A08:17100250-17120485+	1950	9.19	225546	5853	42	PlasmaMembrane	WGD or Segmental
GbCalS11	GB_A10G1042	A10:20296966-20318339-	1890	8.84	219655	5673	42	PlasmaMembrane	WGD or Segmental
GbCalS12	GB_A10G1811	A10:85255625-85271614+	1923	9.03	220607	5772	42	PlasmaMembrane	Proximal
GbCalS13	GB_A11G3402	A11:110041898-110058691-	1957	8.7	226373	5874	41	PlasmaMembrane	WGD or Segmental
GbCalS14	GB_A13G0587	A13:11004668-11009946-	1603	9.07	186294	4812	5	PlasmaMembrane	WGD or Segmental
GbCalS15	GB_D02G0374	D02:4554602-4560688-	1568	8.56	183537	4707	7	PlasmaMembrane	Dispersed
GbCalS16	GB_D02G2022	D02:62332099-62337411-	1770	9.04	206225	5313	1	PlasmaMembrane	WGD or Segmental
GbCalS17	GB_D03G1202	D03:40867922-40896268-	1898	8.73	218025	5697	51	PlasmaMembrane	WGD or Segmental
GbCalS18	GB_D04G0379	D04:4975811-4999384+	1915	8.78	223047	5748	42	PlasmaMembrane	WGD or Segmental
GbCalS19	GB_D04G2207	D04:57284138-57298896+	1700	9	197146	5103	37	PlasmaMembrane	WGD or Segmental
GbCalS20	GB_D05G1671	D05:14340530-14346052-	1777	9.06	206470	5334	2	PlasmaMembrane	WGD or Segmental
GbCalS21	GB_D08G0159	D08:1262095-1294953-	1899	8.35	218762	5700	51	PlasmaMembrane	WGD or Segmental
GbCalS22	GB_D08G0872	D08:13795128-13815612+	1950	9.11	225557	5853	42	PlasmaMembrane	WGD or Segmental
GbCalS23	GB_D08G0873	D08:13842282-13871780+	1950	8.99	225811	5853	42	PlasmaMembrane	Tandem
GbCalS24	GB_D10G0942	D10:11177702-11198786+	1890	8.86	219584	5673	42	PlasmaMembrane	WGD or Segmental
GbCalS25	GB_D10G1180	D10:16898679-16913774+	1917	8.95	220163	5754	42	PlasmaMembrane	Proximal
GbCalS26	GB_D10G1184	D10:17002262-17014515-	1923	9.02	220549	5772	42	PlasmaMembrane	Proximal
GbCalS27	GB_D11G3370	D11:66138656-66155534-	1973	8.39	228274	5922	41	PlasmaMembrane	WGD or Segmental
GbCalS28	GB_D13G0700	D13:9132570-9137843+	1757	9.08	204756	5274	1	PlasmaMembrane	WGD or Segmental
GhCalS1	GH_A02G0335	A02:3604550-3609823+	1494	7.28	174753	4485	4	PlasmaMembrane	WGD or Segmental
GhCalS2	GH_A03G0761	A03:15571947-15600173+	1898	8.67	217950	5697	51	PlasmaMembrane	WGD or Segmental
GhCalS3	GH_A03G1797	A03:103990223-103995535-	1770	9.07	206341	5313	1	PlasmaMembrane	WGD or Segmental
GhCalS4	GH_A04G1249	A04:81010464-81015764-	1766	9.02	205430	5301	1	PlasmaMembrane	WGD or Segmental
GhCalS5	GH_A04G1770	A04:87638454-87653593+	1693	9.07	196543	5082	37	PlasmaMembrane	WGD or Segmental
GhCalS6	GH_A05G1624	A05:15274311-15279836-	1778	9.12	206028	5337	2	PlasmaMembrane	WGD or Segmental
GhCalS7	GH_A05G4004	A05:104913518-104941015-	1915	8.81	222980	5748	42	PlasmaMembrane	WGD or Segmental
GhCalS8	GH_A08G0161	A08:1276502-1314599-	1899	8.43	218656	5700	51	PlasmaMembrane	WGD or Segmental
GhCalS9	GH_A08G0841	A08:17461475-17482124+	1950	9.21	225672	5853	42	PlasmaMembrane	WGD or Segmental
GhCalS10	GH_A10G1004	A10:20097251-20118625-	1890	8.84	219727	5673	42	PlasmaMembrane	WGD or Segmental
GhCalS11	GH_A10G1706	A10:89995632-90012342+	1923	9	220673	5772	42	PlasmaMembrane	Proximal
GhCalS12	GH_A10G1709	A10:90085730-90101323-	1917	8.97	220200	5754	42	PlasmaMembrane	Proximal
GhCalS13	GH_A11G3315	A11:115306411-115323206-	1957	8.67	226331	5874	41	PlasmaMembrane	WGD or Segmental
GhCalS14	GH_D02G0361	D02:4548602-4553749+	1715	7.6	200807	5148	1	PlasmaMembrane	WGD or Segmental
GhCalS15	GH_D02G1957	D02:63315448-63320760-	1770	9.04	206225	5313	1	PlasmaMembrane	WGD or Segmental
GhCalS16	GH_D03G1180	D03:40857876-40886220-	1898	8.73	218073	5697	51	PlasmaMembrane	WGD or Segmental
GhCalS17	GH_D04G0370	D04:5367267-5390693+	1915	8.75	222989	5748	42	PlasmaMembrane	WGD or Segmental
GhCalS18	GH_D04G2117	D04:56872774-56887528+	1700	9.01	197179	5103	37	PlasmaMembrane	WGD or Segmental
GhCalS19	GH_D05G1655	D05:14092287-14097806-	1776	9.08	206344	5331	2	PlasmaMembrane	WGD or Segmental
GhCalS20	GH_D08G0169	D08:1323348-1352292-	1899	8.42	218797	5700	51	PlasmaMembrane	WGD or Segmental
GhCalS21	GH_D08G0849	D08:13214259-13234749+	1950	9.13	225700	5853	42	PlasmaMembrane	WGD or Segmental
GhCalS22	GH_D08G0850	D08:13261393-13312065+	1949	9.05	225752	5850	42	PlasmaMembrane	Tandem
GhCalS23	GH_D10G0956	D10:10972777-10993873+	1890	8.81	219585	5673	42	PlasmaMembrane	WGD or Segmental
GhCalS24	GH_D10G1192	D10:16576520-16602985+	1917	8.99	220140	5754	42	PlasmaMembrane	Proximal
GhCalS25	GH_D10G1195	D10:16679954-16691876-	1923	9.03	220577	5772	42	PlasmaMembrane	Proximal
GhCalS26	GH_D11G3324	D11:65361355-65400976-	1957	8.16	226038	5874	41	PlasmaMembrane	WGD or Segmental
GhCalS27	GH_D13G0689	D13:9414186-9419459+	1757	9.08	204708	5274	1	PlasmaMembrane	WGD or Segmental
GrCalS1	Gorai.003G109000.1	Chr03:33337768-33366837-	1898	8.67	217982	5697	51	PlasmaMembrane	Tandem
GrCalS2	Gorai.004G018200.1	Chr04:1300844-1330765-	1899	8.47	218758	5700	51	PlasmaMembrane	Tandem
GrCalS3	Gorai.004G092500.1	Chr04:13038318-13059817+	1950	9.14	225796	5853	42	PlasmaMembrane	Tandem
GrCalS4	Gorai.004G092600.1	Chr04:13088089-13118930+	1950	9.01	225887	5853	42	PlasmaMembrane	Tandem
GrCalS5	Gorai.005G042700.1	Chr05:4104078-4109225+	1715	7.44	200738	5148	1	PlasmaMembrane	Proximal
GrCalS6	Gorai.005G043100.1	Chr05:4138978-4144128-	1716	8.71	201168	5151	1	PlasmaMembrane	Proximal
GrCalS7	Gorai.005G201500.1	Chr05:57766577-57774145-	1770	9.15	206271	5313	1	PlasmaMembrane	Tandem
GrCalS8	Gorai.007G334800.1	Chr07:55888971-55905985-	1908	7.19	220736	5727	41	PlasmaMembrane	Tandem
GrCalS9	Gorai.009G169700.1	Chr09:13091542-13098145-	1777	9.06	206476	5334	2	PlasmaMembrane	Tandem
GrCalS10	Gorai.011G096900.1	Chr11:10644643-10664528+	1749	8.96	203692	5250	39	PlasmaMembrane	Tandem
GrCalS11	Gorai.011G119900.1	Chr11:16488250-16504053+	1917	9	220020	5754	42	PlasmaMembrane	Proximal
GrCalS12	Gorai.011G120300.1	Chr11:16559349-16570566-	1922	9.03	220488	5769	42	PlasmaMembrane	Proximal
GrCalS13	Gorai.012G040000.1	Chr12:4964230-4988423+	1920	8.75	223626	5763	43	PlasmaMembrane	Tandem
GrCalS14	Gorai.012G187400.1	Chr12:35387755-35402913+	1711	8.95	198878	5136	38	PlasmaMembrane	Tandem
GrCalS15	Gorai.013G075600.1	Chr13:9259700-9264973+	1757	9.1	204674	5274	1	PlasmaMembrane	Dispersed
