# Supplementary material for: Genome-wide analysis of the CalS gene family in cotton reveals their potential roles in fiber development and responses to stress
Source: PeerJ. 2021 Nov 30;9:e12557. doi: 10.7717/peerj.12557 (PMC8641485; doi:10.7717/peerj.12557)
Supplement: Supplemental Information 3 [file peerj-09-12557-s003.xlsx]

## Sheet: Sheet1
Table S3. List of the number of CalS family genes.
Species	Group A	Group B	Group C	Group D	Group E
G. hirsutum	8	4	6	2	7
G. barbadense	10	4	6	2	6
G. arboretum	6	2	3	1	4
G. raimondii	5	2	3	1	4
A. thaliana	2	2	2	1	5
