# Supplementary material for: Genome-wide analysis of the CalS gene family in cotton reveals their potential roles in fiber development and responses to stress
Source: PeerJ. 2021 Nov 30;9:e12557. doi: 10.7717/peerj.12557 (PMC8641485; doi:10.7717/peerj.12557)
Supplement: Supplemental Information 4 [file peerj-09-12557-s004.xlsx]

## Sheet: Sheet1
Genes of At subgenome	Orthologous genes in G. arboreum L.
GbCalS1	GaCalS2
GbCalS3	GaCalS1
GbCalS4	GaCalS5
GbCalS4	GaCalS7
GbCalS5	GaCalS5
GbCalS5	GaCalS15
GbCalS6	GaCalS16
GbCalS7	GaCalS7
GbCalS8	GaCalS6
GbCalS9	GaCalS8
GbCalS10	GaCalS9
GbCalS11	GaCalS13
GbCalS12	GaCalS11
GbCalS13	GaCalS14
GbCalS14	GaCalS5
GbCalS14	GaCalS15
GhCalS1	GaCalS2
GhCalS2	GaCalS1
GhCalS3	GaCalS5
GhCalS3	GaCalS7
GhCalS3	GaCalS15
GhCalS4	GaCalS5
GhCalS4	GaCalS15
GhCalS5	GaCalS16
GhCalS6	GaCalS7
GhCalS7	GaCalS6
GhCalS8	GaCalS8
GhCalS9	GaCalS9
GhCalS10	GaCalS13
GhCalS11	GaCalS11
GhCalS13	GaCalS14
Genes of Dt subgenome	Orthologous genes in G. raimondii.
GbCalS17	GrCalS1
GbCalS18	GrCalS13
GbCalS19	GrCalS14
GbCalS21	GrCalS2
GbCalS24	GrCalS10
GbCalS25	GrCalS11
GbCalS27	GrCalS8
GbCalS28	GrCalS15
GhCalS14	GrCalS5
GhCalS16	GrCalS1
GhCalS17	GrCalS13
GhCalS18	GrCalS14
GhCalS20	GrCalS2
GhCalS23	GrCalS10
GhCalS24	GrCalS11
GhCalS26	GrCalS8
GhCalS27	GrCalS15
Genes of G. hirsutum L.	Genes of G. hirsutum L.
GhCalS1	GhCalS14
GhCalS2	GhCalS16
GhCalS3	GhCalS27
GhCalS3	GhCalS4
GhCalS3	GhCalS19
GhCalS3	GhCalS15
GhCalS4	GhCalS15
GhCalS4	GhCalS27
GhCalS5	GhCalS18
GhCalS6	GhCalS19
GhCalS7	GhCalS17
GhCalS8	GhCalS20
GhCalS9	GhCalS21
GhCalS10	GhCalS23
GhCalS13	GhCalS26
Genes of G. barbadense L.	Genes of G. barbadense L.
GbCalS3	GbCalS17
GbCalS4	GbCalS16
GbCalS4	GbCalS5
GbCalS5	GbCalS14
GbCalS5	GbCalS16
GbCalS5	GbCalS28
GbCalS6	GbCalS19
GbCalS7	GbCalS20
GbCalS8	GbCalS18
GbCalS9	GbCalS21
GbCalS10	GbCalS22
GbCalS11	GbCalS24
GbCalS13	GbCalS27
GbCalS14	GbCalS28
Genes in G. arboreum L.	Genes in G. arboreum L.
GaCalS5	GaCalS15
