# Supplementary material for: Genome-wide analysis of the CalS gene family in cotton reveals their potential roles in fiber development and responses to stress
Source: PeerJ. 2021 Nov 30;9:e12557. doi: 10.7717/peerj.12557 (PMC8641485; doi:10.7717/peerj.12557)
Supplement: Supplemental Information 5 [file peerj-09-12557-s005.xlsx]

## Sheet: Sheet1
Gene Name	Gene Name	Ka	Ks	Ka_Ks
GbCalS3	GaCalS1	0.00160471	0.00607983	0.26394
GbCalS17	GaCalS1	0.00551283	0.0437225	0.126087
GbCalS1	GaCalS2	0.00790968	0.00483561	1.63572
GbCalS16	GaCalS5	0.0697552	0.499438	0.139667
GbCalS14	GaCalS5	0.102008	0.467216	0.218332
GbCalS28	GaCalS5	0.0991004	0.44972	0.22036
GbCalS4	GaCalS5	0.0676453	0.493036	0.137202
GbCalS5	GaCalS5	0.00122277	0.00250505	0.488122
GbCalS8	GaCalS6	0.00116286	0.00530563	0.219175
GbCalS18	GaCalS6	0.00897774	0.0270099	0.332387
GbCalS20	GaCalS7	0.00660811	0.052575	0.125689
GbCalS7	GaCalS7	0.00243997	0.00657043	0.371356
GbCalS16	GaCalS7	0.208417	2.26011	0.0922157
GbCalS4	GaCalS7	0.207876	2.25048	0.0923697
GbCalS9	GaCalS8	0.0013724	0.00841148	0.163157
GbCalS21	GaCalS8	0.00804036	0.0438567	0.183332
GbCalS10	GaCalS9	0.00644353	0.0144895	0.444703
GbCalS22	GaCalS9	0.010355	0.0464025	0.223155
GbCalS12	GaCalS11	0.0041406	0.00744423	0.556216
GbCalS11	GaCalS13	0.00643388	0.0141259	0.455465
GbCalS24	GaCalS13	0.0122079	0.0400398	0.304895
GbCalS27	GaCalS14	0.0130756	0.0406773	0.321447
GbCalS13	GaCalS14	0.000879	0.00842813	0.104312
GbCalS14	GaCalS15	0.00269427	0.00648102	0.415717
GbCalS5	GaCalS15	0.0982426	0.460932	0.213139
GbCalS28	GaCalS15	0.00691164	0.0412771	0.167445
GbCalS6	GaCalS16	0.00836478	0.0136824	0.611354
GbCalS19	GaCalS16	0.0174329	0.0439942	0.396255
GbCalS17	GbCalS3	0.00620503	0.0397083	0.156265
GbCalS16	GbCalS4	0.00956227	0.0358609	0.266649
GbCalS5	GbCalS4	0.0679058	0.490059	0.138566
GbCalS14	GbCalS5	0.102439	0.463206	0.221152
GbCalS16	GbCalS5	0.0700162	0.496439	0.141037
GbCalS28	GbCalS5	0.0999102	0.44548	0.224276
GbCalS19	GbCalS6	0.0117242	0.0331868	0.35328
GbCalS20	GbCalS7	0.00857712	0.0525787	0.163129
GbCalS18	GbCalS8	0.00871116	0.026353	0.330557
GbCalS21	GbCalS9	0.00746475	0.0418131	0.178526
GbCalS22	GbCalS10	0.00477108	0.0375756	0.126973
GbCalS24	GbCalS11	0.00664317	0.0319388	0.207997
GbCalS27	GbCalS13	0.0135244	0.0430759	0.313966
GbCalS28	GbCalS14	0.00866749	0.0427196	0.202893
GbCalS3	GrCalS1	0.00643485	0.0373327	0.172365
GbCalS17	GrCalS1	0.00114434	0.0107199	0.106749
GbCalS21	GrCalS2	0.00561983	0.0298624	0.188191
GbCalS9	GrCalS2	0.00850437	0.0414087	0.205377
GbCalS1	GrCalS5	0.0446814	0.104294	0.428419
GbCalS27	GrCalS8	0.00385183	0.0158883	0.242431
GbCalS13	GrCalS8	0.0133414	0.0465519	0.286591
GbCalS11	GrCalS10	0.00668694	0.0380732	0.175634
GbCalS24	GrCalS10	0.00148069	0.00934195	0.158499
GbCalS25	GrCalS11	0.00135947	0.00909446	0.149483
GbCalS18	GrCalS13	0.000904	0.00778722	0.116095
GbCalS8	GrCalS13	0.00828706	0.0280554	0.295382
GbCalS6	GrCalS14	0.0175072	0.0439246	0.398573
GbCalS19	GrCalS14	0.00842351	0.0208009	0.404959
GbCalS5	GrCalS15	0.100614	0.449297	0.223937
GbCalS14	GrCalS15	0.00921213	0.0398009	0.231455
GbCalS28	GrCalS15	0.00270803	0.00925678	0.292545
GhCalS2	GaCalS1	0.00114567	0.00684719	0.16732
GhCalS16	GaCalS1	0.00597384	0.0421218	0.141823
GhCalS14	GaCalS2	0.0434259	0.0985175	0.440794
GhCalS1	GaCalS2	0.0467501	0.0845518	0.552917
GhCalS15	GaCalS5	0.0697552	0.499438	0.139667
GhCalS3	GaCalS5	0.0660914	0.494186	0.133738
GhCalS4	GaCalS5	0.00195743	0.00334169	0.585759
GhCalS27	GaCalS5	0.0992454	0.44734	0.221856
GhCalS17	GaCalS6	0.00852105	0.0278278	0.306207
GhCalS7	GaCalS6	0.00138819	0.00297132	0.467197
GhCalS15	GaCalS7	0.208417	2.26011	0.0922157
GhCalS3	GaCalS7	0.206684	2.24238	0.0921718
GhCalS6	GaCalS7	0.00243997	0.0073958	0.329913
GhCalS19	GaCalS7	0.00710383	0.05173	0.137325
GhCalS8	GaCalS8	0.00137214	0.00841684	0.163022
GhCalS20	GaCalS8	0.0082704	0.0438739	0.188504
GhCalS21	GaCalS9	0.0101306	0.0431942	0.234536
GhCalS9	GaCalS9	0.00577385	0.0144941	0.398358
GhCalS11	GaCalS11	0.00414115	0.00590854	0.700875
GhCalS10	GaCalS13	0.00666323	0.0133357	0.499653
GhCalS23	GaCalS13	0.0124403	0.043337	0.28706
GhCalS13	GaCalS14	0.00109898	0.00920257	0.119421
GhCalS26	GaCalS14	0.0148683	0.0454555	0.327096
GhCalS27	GaCalS15	0.00691192	0.0386241	0.178954
GhCalS3	GaCalS15	0.082297	0.425332	0.193489
GhCalS4	GaCalS15	0.099087	0.462442	0.214269
GhCalS5	GaCalS16	0.0119807	0.0181863	0.658778
GhCalS18	GaCalS16	0.0174303	0.0440176	0.395985
GhCalS14	GhCalS1	0.0215247	0.0583721	0.36875
GhCalS16	GhCalS2	0.00620372	0.0405372	0.153038
GhCalS27	GhCalS3	0.0818449	0.405604	0.201785
GhCalS4	GhCalS3	0.0672886	0.491962	0.136776
GhCalS19	GhCalS3	0.20487	2.37629	0.0862139
GhCalS15	GhCalS3	0.0085766	0.0376013	0.228093
GhCalS15	GhCalS4	0.070958	0.4972	0.142715
GhCalS27	GhCalS4	0.100903	0.444591	0.226957
GhCalS18	GhCalS5	0.0125486	0.03516	0.356899
GhCalS19	GhCalS6	0.00907523	0.0526122	0.172493
GhCalS17	GhCalS7	0.00836876	0.0251645	0.332562
GhCalS20	GhCalS8	0.00769326	0.0418568	0.1838
GhCalS21	GhCalS9	0.0043255	0.0328365	0.131728
GhCalS23	GhCalS10	0.00687277	0.0343992	0.199795
GhCalS26	GhCalS13	0.0155469	0.0487178	0.319122
GhCalS2	GrCalS1	0.00597235	0.0397521	0.15024
GhCalS16	GrCalS1	0.0016025	0.00841095	0.190526
GhCalS8	GrCalS2	0.00850274	0.0414357	0.205203
GhCalS20	GrCalS2	0.00584944	0.029874	0.195804
GhCalS1	GrCalS5	0.0218229	0.0605136	0.360629
GhCalS14	GrCalS5	0.00176101	0.00693246	0.254023
GhCalS13	GrCalS8	0.0135719	0.0474143	0.286241
GhCalS26	GrCalS8	0.00702769	0.0235576	0.29832
GhCalS10	GrCalS10	0.00668611	0.0372022	0.179724
GhCalS23	GrCalS10	0.00172783	0.0127663	0.135343
GhCalS24	GrCalS11	0.00181338	0.00832921	0.217713
GhCalS17	GrCalS13	0.000452	0.00857542	0.0526873
GhCalS7	GrCalS13	0.00840154	0.0260415	0.322621
GhCalS5	GrCalS14	0.021176	0.0486018	0.435704
GhCalS18	GrCalS14	0.00842225	0.0208118	0.404686
GhCalS27	GrCalS15	0.00320158	0.00671991	0.476432
GhCalS4	GrCalS15	0.101463	0.450787	0.225079
GbCalS1	GhCalS14	0.0443842	0.105409	0.421065
GbCalS19	GhCalS5	0.0131522	0.0348446	0.377454
GbCalS18	GhCalS7	0.0088253	0.0243509	0.362422
GbCalS6	GhCalS18	0.0117225	0.0332042	0.353042
GbCalS27	GhCalS13	0.0137466	0.0430928	0.319
GbCalS13	GhCalS26	0.0150039	0.0490164	0.306099
GbCalS8	GhCalS17	0.00825473	0.0271701	0.303817
GbCalS13	GhCalS13	0.000659	0.0022892	0.28799
GbCalS4	GhCalS15	0.00956227	0.0358609	0.266649
GbCalS16	GhCalS3	0.0085766	0.0376013	0.228093
GbCalS5	GhCalS27	0.100187	0.441008	0.227178
GbCalS24	GhCalS10	0.00664241	0.031136	0.213335
GbCalS14	GhCalS27	0.00839586	0.0397821	0.211046
GbCalS11	GhCalS23	0.00687356	0.0352041	0.195249
GbCalS9	GhCalS20	0.00769473	0.0418295	0.183955
GbCalS7	GhCalS19	0.00907523	0.0508562	0.178449
GbCalS21	GhCalS8	0.00746332	0.0418404	0.178376
GbCalS3	GhCalS16	0.00666645	0.0381158	0.1749
GbCalS20	GhCalS6	0.00857712	0.0525787	0.163129
GbCalS16	GhCalS4	0.0706892	0.495581	0.142639
GbCalS5	GhCalS15	0.0697477	0.494822	0.140955
GbCalS4	GhCalS4	0.0685768	0.487606	0.14064
GbCalS17	GhCalS2	0.00574264	0.0421355	0.13629
GbCalS5	GhCalS3	0.0660843	0.487996	0.13542
GbCalS22	GhCalS9	0.00454807	0.0359999	0.126336
GbCalS12	GhCalS25	0.00225619	0.0443335	0.0508913
GbCalS26	GhCalS11	0.00203065	0.0419065	0.0484566
GbCalS2	GbCalS1	0.0560413	0.102522	0.54663
GbCalS23	GbCalS22	0.00822733	0.0732046	0.112388
GhCalS22	GhCalS21	0.00834269	0.0720139	0.115848
