# Supplementary material for: Genome-wide analysis of the CalS gene family in cotton reveals their potential roles in fiber development and responses to stress
Source: PeerJ. 2021 Nov 30;9:e12557. doi: 10.7717/peerj.12557 (PMC8641485; doi:10.7717/peerj.12557)
Supplement: Supplemental Information 6 [file peerj-09-12557-s006.xlsx]

## Sheet: 1
	Gibberellin responsive element			auxin responsive element		MeJA responsive element		ABA responsive element	SA responsive element	anaerobic induced response element	anoxic specific inducibility element	drought responsive element	low temperature responsive element	wound responsive element	defence and stress response element
	GARE-motif	P-box	TATC-box	AuxRR-core	TGA-element	CGTCA-motif	TGACG-motif	ABRE	TCA-element	ARE	GC-motif	MBS	LTR	WUN-motif	TC-rich repeats
GhCalS11	2					2	2	7	1	5	1	1	1		1
GhCalS25	2					1	1	5		6	1	1	2
GhCalS14		1			1	2	2	1		2		1			2
GhCalS23			1		1	2	2	2	1	3		1	1		1
GhCalS6		1			1			1		6		1			1
GhCalS19		1						3		7		1			1
GhCalS4						1	1	2	1	2		1	2
GhCalS7						1	1		1	3		1	1
GhCalS10			1			2	2		2	2		1
GhCalS2						2	2	1		1		1
GhCalS8	1	1				3	3	5	1	2		2	1
GhCalS5												3		1	2
GhCalS18								1				3		1	1
GhCalS20	1	1		1		3	3	3		2		3	1
GhCalS22	1	1		1					2	4		3
GhCalS15						1	1			2	1				1
GhCalS17		1				1	1	1		1	1
GhCalS3	1					1	1	2	1						1
GhCalS21	1				1	1	1		1	3			2
GhCalS13										4			1
GhCalS24								2	1	2			1
GhCalS12								1		1			1
GhCalS26										5
GhCalS9	1					2	2	2	2	3
GhCalS27						2	2	1	1	2
GhCalS1						1	1	2		1
GhCalS16						1	1
