# Supplementary material for: Genome-wide analysis of the CalS gene family in cotton reveals their potential roles in fiber development and responses to stress
Source: PeerJ. 2021 Nov 30;9:e12557. doi: 10.7717/peerj.12557 (PMC8641485; doi:10.7717/peerj.12557)
Supplement: Supplemental Information 7 [file peerj-09-12557-s007.xlsx]

## Sheet: ca.GO (2)
Table S7. The GO enrichment analysis of CalS genes.
Ontology	GO ID	GO Term	Gene Number	Pvalue	FDR	gene ID
Molecular function(MF)	GO:0003843	1,3-beta-D-glucan synthase activity	23	1.86816e-76	1.68135e-75	GH_A02G0335;GH_A03G0761;GH_A03G1797;GH_A04G1249;GH_A05G1624;GH_A05G4004;GH_A08G0161;GH_A08G0841;GH_A10G1004;GH_A10G1706;GH_A11G3315;GH_D02G0361;GH_D02G1957;GH_D03G1180;GH_D04G0370;GH_D05G1655;GH_D08G0169;GH_D08G0849;GH_D08G0850;GH_D10G0956;GH_D10G1195;GH_D11G3324;GH_D13G0689
	GO:0035251	UDP-glucosyltransferase activity	23	1.40036e-51	6.30163e-51	GH_A02G0335;GH_A03G0761;GH_A03G1797;GH_A04G1249;GH_A05G1624;GH_A05G4004;GH_A08G0161;GH_A08G0841;GH_A10G1004;GH_A10G1706;GH_A11G3315;GH_D02G0361;GH_D02G1957;GH_D03G1180;GH_D04G0370;GH_D05G1655;GH_D08G0169;GH_D08G0849;GH_D08G0850;GH_D10G0956;GH_D10G1195;GH_D11G3324;GH_D13G0689
	GO:0046527	glucosyltransferase activity	23	2.31234e-51	6.93701e-51	GH_A02G0335;GH_A03G0761;GH_A03G1797;GH_A04G1249;GH_A05G1624;GH_A05G4004;GH_A08G0161;GH_A08G0841;GH_A10G1004;GH_A10G1706;GH_A11G3315;GH_D02G0361;GH_D02G1957;GH_D03G1180;GH_D04G0370;GH_D05G1655;GH_D08G0169;GH_D08G0849;GH_D08G0850;GH_D10G0956;GH_D10G1195;GH_D11G3324;GH_D13G0689
	GO:0008194	UDP-glycosyltransferase activity	23	1.12487e-44	2.53095e-44	GH_A02G0335;GH_A03G0761;GH_A03G1797;GH_A04G1249;GH_A05G1624;GH_A05G4004;GH_A08G0161;GH_A08G0841;GH_A10G1004;GH_A10G1706;GH_A11G3315;GH_D02G0361;GH_D02G1957;GH_D03G1180;GH_D04G0370;GH_D05G1655;GH_D08G0169;GH_D08G0849;GH_D08G0850;GH_D10G0956;GH_D10G1195;GH_D11G3324;GH_D13G0689
	GO:0016758	transferase activity, transferring hexosyl groups	23	1.24781e-37	2.24605e-37	GH_A02G0335;GH_A03G0761;GH_A03G1797;GH_A04G1249;GH_A05G1624;GH_A05G4004;GH_A08G0161;GH_A08G0841;GH_A10G1004;GH_A10G1706;GH_A11G3315;GH_D02G0361;GH_D02G1957;GH_D03G1180;GH_D04G0370;GH_D05G1655;GH_D08G0169;GH_D08G0849;GH_D08G0850;GH_D10G0956;GH_D10G1195;GH_D11G3324;GH_D13G0689
	GO:0016757	transferase activity, transferring glycosyl groups	23	7.54648e-34	1.13197e-33	GH_A02G0335;GH_A03G0761;GH_A03G1797;GH_A04G1249;GH_A05G1624;GH_A05G4004;GH_A08G0161;GH_A08G0841;GH_A10G1004;GH_A10G1706;GH_A11G3315;GH_D02G0361;GH_D02G1957;GH_D03G1180;GH_D04G0370;GH_D05G1655;GH_D08G0169;GH_D08G0849;GH_D08G0850;GH_D10G0956;GH_D10G1195;GH_D11G3324;GH_D13G0689
	GO:0016740	transferase activity	23	3.5401e-15	4.55155e-15	GH_A02G0335;GH_A03G0761;GH_A03G1797;GH_A04G1249;GH_A05G1624;GH_A05G4004;GH_A08G0161;GH_A08G0841;GH_A10G1004;GH_A10G1706;GH_A11G3315;GH_D02G0361;GH_D02G1957;GH_D03G1180;GH_D04G0370;GH_D05G1655;GH_D08G0169;GH_D08G0849;GH_D08G0850;GH_D10G0956;GH_D10G1195;GH_D11G3324;GH_D13G0689
	GO:0003824	catalytic activity	23	3.73387e-06	4.20061e-06	GH_A02G0335;GH_A03G0761;GH_A03G1797;GH_A04G1249;GH_A05G1624;GH_A05G4004;GH_A08G0161;GH_A08G0841;GH_A10G1004;GH_A10G1706;GH_A11G3315;GH_D02G0361;GH_D02G1957;GH_D03G1180;GH_D04G0370;GH_D05G1655;GH_D08G0169;GH_D08G0849;GH_D08G0850;GH_D10G0956;GH_D10G1195;GH_D11G3324;GH_D13G0689
Cellular component(CC)	GO:0000148	1,3-beta-D-glucan synthase complex	23	5.37836e-74	9.14321e-73	GH_A02G0335;GH_A03G0761;GH_A03G1797;GH_A04G1249;GH_A05G1624;GH_A05G4004;GH_A08G0161;GH_A08G0841;GH_A10G1004;GH_A10G1706;GH_A11G3315;GH_D02G0361;GH_D02G1957;GH_D03G1180;GH_D04G0370;GH_D05G1655;GH_D08G0169;GH_D08G0849;GH_D08G0850;GH_D10G0956;GH_D10G1195;GH_D11G3324;GH_D13G0689
	GO:0098797	plasma membrane protein complex	23	9.03965e-61	7.6837e-60	GH_A02G0335;GH_A03G0761;GH_A03G1797;GH_A04G1249;GH_A05G1624;GH_A05G4004;GH_A08G0161;GH_A08G0841;GH_A10G1004;GH_A10G1706;GH_A11G3315;GH_D02G0361;GH_D02G1957;GH_D03G1180;GH_D04G0370;GH_D05G1655;GH_D08G0169;GH_D08G0849;GH_D08G0850;GH_D10G0956;GH_D10G1195;GH_D11G3324;GH_D13G0689
	GO:0044459	plasma membrane part	23	2.1253e-48	1.20434e-47	GH_A02G0335;GH_A03G0761;GH_A03G1797;GH_A04G1249;GH_A05G1624;GH_A05G4004;GH_A08G0161;GH_A08G0841;GH_A10G1004;GH_A10G1706;GH_A11G3315;GH_D02G0361;GH_D02G1957;GH_D03G1180;GH_D04G0370;GH_D05G1655;GH_D08G0169;GH_D08G0849;GH_D08G0850;GH_D10G0956;GH_D10G1195;GH_D11G3324;GH_D13G0689
	GO:1990234	transferase complex	23	1.55573e-43	6.61187e-43	GH_A02G0335;GH_A03G0761;GH_A03G1797;GH_A04G1249;GH_A05G1624;GH_A05G4004;GH_A08G0161;GH_A08G0841;GH_A10G1004;GH_A10G1706;GH_A11G3315;GH_D02G0361;GH_D02G1957;GH_D03G1180;GH_D04G0370;GH_D05G1655;GH_D08G0169;GH_D08G0849;GH_D08G0850;GH_D10G0956;GH_D10G1195;GH_D11G3324;GH_D13G0689
	GO:1902494	catalytic complex	23	2.08032e-37	7.0731e-37	GH_A02G0335;GH_A03G0761;GH_A03G1797;GH_A04G1249;GH_A05G1624;GH_A05G4004;GH_A08G0161;GH_A08G0841;GH_A10G1004;GH_A10G1706;GH_A11G3315;GH_D02G0361;GH_D02G1957;GH_D03G1180;GH_D04G0370;GH_D05G1655;GH_D08G0169;GH_D08G0849;GH_D08G0850;GH_D10G0956;GH_D10G1195;GH_D11G3324;GH_D13G0689
	GO:0098796	membrane protein complex	23	1.64747e-36	4.66783e-36	GH_A02G0335;GH_A03G0761;GH_A03G1797;GH_A04G1249;GH_A05G1624;GH_A05G4004;GH_A08G0161;GH_A08G0841;GH_A10G1004;GH_A10G1706;GH_A11G3315;GH_D02G0361;GH_D02G1957;GH_D03G1180;GH_D04G0370;GH_D05G1655;GH_D08G0169;GH_D08G0849;GH_D08G0850;GH_D10G0956;GH_D10G1195;GH_D11G3324;GH_D13G0689
	GO:0005886	plasma membrane	23	1.0391e-28	2.52353e-28	GH_A02G0335;GH_A03G0761;GH_A03G1797;GH_A04G1249;GH_A05G1624;GH_A05G4004;GH_A08G0161;GH_A08G0841;GH_A10G1004;GH_A10G1706;GH_A11G3315;GH_D02G0361;GH_D02G1957;GH_D03G1180;GH_D04G0370;GH_D05G1655;GH_D08G0169;GH_D08G0849;GH_D08G0850;GH_D10G0956;GH_D10G1195;GH_D11G3324;GH_D13G0689
	GO:0071944	cell periphery	23	1.20887e-25	2.56885e-25	GH_A02G0335;GH_A03G0761;GH_A03G1797;GH_A04G1249;GH_A05G1624;GH_A05G4004;GH_A08G0161;GH_A08G0841;GH_A10G1004;GH_A10G1706;GH_A11G3315;GH_D02G0361;GH_D02G1957;GH_D03G1180;GH_D04G0370;GH_D05G1655;GH_D08G0169;GH_D08G0849;GH_D08G0850;GH_D10G0956;GH_D10G1195;GH_D11G3324;GH_D13G0689
	GO:0043234	protein complex	23	1.6752e-25	3.16428e-25	GH_A02G0335;GH_A03G0761;GH_A03G1797;GH_A04G1249;GH_A05G1624;GH_A05G4004;GH_A08G0161;GH_A08G0841;GH_A10G1004;GH_A10G1706;GH_A11G3315;GH_D02G0361;GH_D02G1957;GH_D03G1180;GH_D04G0370;GH_D05G1655;GH_D08G0169;GH_D08G0849;GH_D08G0850;GH_D10G0956;GH_D10G1195;GH_D11G3324;GH_D13G0689
	GO:0032991	macromolecular complex	23	4.28391e-21	7.28264e-21	GH_A02G0335;GH_A03G0761;GH_A03G1797;GH_A04G1249;GH_A05G1624;GH_A05G4004;GH_A08G0161;GH_A08G0841;GH_A10G1004;GH_A10G1706;GH_A11G3315;GH_D02G0361;GH_D02G1957;GH_D03G1180;GH_D04G0370;GH_D05G1655;GH_D08G0169;GH_D08G0849;GH_D08G0850;GH_D10G0956;GH_D10G1195;GH_D11G3324;GH_D13G0689
	GO:0016021	integral component of membrane	23	7.9145e-08	1.20608e-07	GH_A02G0335;GH_A03G0761;GH_A03G1797;GH_A04G1249;GH_A05G1624;GH_A05G4004;GH_A08G0161;GH_A08G0841;GH_A10G1004;GH_A10G1706;GH_A11G3315;GH_D02G0361;GH_D02G1957;GH_D03G1180;GH_D04G0370;GH_D05G1655;GH_D08G0169;GH_D08G0849;GH_D08G0850;GH_D10G0956;GH_D10G1195;GH_D11G3324;GH_D13G0689
	GO:0031224	intrinsic component of membrane	23	8.5135e-08	1.20608e-07	GH_A02G0335;GH_A03G0761;GH_A03G1797;GH_A04G1249;GH_A05G1624;GH_A05G4004;GH_A08G0161;GH_A08G0841;GH_A10G1004;GH_A10G1706;GH_A11G3315;GH_D02G0361;GH_D02G1957;GH_D03G1180;GH_D04G0370;GH_D05G1655;GH_D08G0169;GH_D08G0849;GH_D08G0850;GH_D10G0956;GH_D10G1195;GH_D11G3324;GH_D13G0689
	GO:0044425	membrane part	23	2.05194e-07	2.6833e-07	GH_A02G0335;GH_A03G0761;GH_A03G1797;GH_A04G1249;GH_A05G1624;GH_A05G4004;GH_A08G0161;GH_A08G0841;GH_A10G1004;GH_A10G1706;GH_A11G3315;GH_D02G0361;GH_D02G1957;GH_D03G1180;GH_D04G0370;GH_D05G1655;GH_D08G0169;GH_D08G0849;GH_D08G0850;GH_D10G0956;GH_D10G1195;GH_D11G3324;GH_D13G0689
	GO:0044464	cell part	23	2.19081e-06	2.66027e-06	GH_A02G0335;GH_A03G0761;GH_A03G1797;GH_A04G1249;GH_A05G1624;GH_A05G4004;GH_A08G0161;GH_A08G0841;GH_A10G1004;GH_A10G1706;GH_A11G3315;GH_D02G0361;GH_D02G1957;GH_D03G1180;GH_D04G0370;GH_D05G1655;GH_D08G0169;GH_D08G0849;GH_D08G0850;GH_D10G0956;GH_D10G1195;GH_D11G3324;GH_D13G0689
	GO:0005623	cell	23	3.08353e-06	3.49466e-06	GH_A02G0335;GH_A03G0761;GH_A03G1797;GH_A04G1249;GH_A05G1624;GH_A05G4004;GH_A08G0161;GH_A08G0841;GH_A10G1004;GH_A10G1706;GH_A11G3315;GH_D02G0361;GH_D02G1957;GH_D03G1180;GH_D04G0370;GH_D05G1655;GH_D08G0169;GH_D08G0849;GH_D08G0850;GH_D10G0956;GH_D10G1195;GH_D11G3324;GH_D13G0689
	GO:0016020	membrane	23	4.51091e-06	4.79284e-06	GH_A02G0335;GH_A03G0761;GH_A03G1797;GH_A04G1249;GH_A05G1624;GH_A05G4004;GH_A08G0161;GH_A08G0841;GH_A10G1004;GH_A10G1706;GH_A11G3315;GH_D02G0361;GH_D02G1957;GH_D03G1180;GH_D04G0370;GH_D05G1655;GH_D08G0169;GH_D08G0849;GH_D08G0850;GH_D10G0956;GH_D10G1195;GH_D11G3324;GH_D13G0689
Biological process(BP)	GO:0006074	(1->3)-beta-D-glucan metabolic process	23	1.51044e-74	3.17192e-73	GH_A02G0335;GH_A03G0761;GH_A03G1797;GH_A04G1249;GH_A05G1624;GH_A05G4004;GH_A08G0161;GH_A08G0841;GH_A10G1004;GH_A10G1706;GH_A11G3315;GH_D02G0361;GH_D02G1957;GH_D03G1180;GH_D04G0370;GH_D05G1655;GH_D08G0169;GH_D08G0849;GH_D08G0850;GH_D10G0956;GH_D10G1195;GH_D11G3324;GH_D13G0689
	GO:0006075	(1->3)-beta-D-glucan biosynthetic process	23	1.51044e-74	3.17192e-73	GH_A02G0335;GH_A03G0761;GH_A03G1797;GH_A04G1249;GH_A05G1624;GH_A05G4004;GH_A08G0161;GH_A08G0841;GH_A10G1004;GH_A10G1706;GH_A11G3315;GH_D02G0361;GH_D02G1957;GH_D03G1180;GH_D04G0370;GH_D05G1655;GH_D08G0169;GH_D08G0849;GH_D08G0850;GH_D10G0956;GH_D10G1195;GH_D11G3324;GH_D13G0689
	GO:0051274	beta-glucan biosynthetic process	23	2.38882e-55	3.34435e-54	GH_A02G0335;GH_A03G0761;GH_A03G1797;GH_A04G1249;GH_A05G1624;GH_A05G4004;GH_A08G0161;GH_A08G0841;GH_A10G1004;GH_A10G1706;GH_A11G3315;GH_D02G0361;GH_D02G1957;GH_D03G1180;GH_D04G0370;GH_D05G1655;GH_D08G0169;GH_D08G0849;GH_D08G0850;GH_D10G0956;GH_D10G1195;GH_D11G3324;GH_D13G0689
	GO:0051273	beta-glucan metabolic process	23	4.68983e-52	4.92433e-51	GH_A02G0335;GH_A03G0761;GH_A03G1797;GH_A04G1249;GH_A05G1624;GH_A05G4004;GH_A08G0161;GH_A08G0841;GH_A10G1004;GH_A10G1706;GH_A11G3315;GH_D02G0361;GH_D02G1957;GH_D03G1180;GH_D04G0370;GH_D05G1655;GH_D08G0169;GH_D08G0849;GH_D08G0850;GH_D10G0956;GH_D10G1195;GH_D11G3324;GH_D13G0689
	GO:0009250	glucan biosynthetic process	23	8.55637e-52	7.18735e-51	GH_A02G0335;GH_A03G0761;GH_A03G1797;GH_A04G1249;GH_A05G1624;GH_A05G4004;GH_A08G0161;GH_A08G0841;GH_A10G1004;GH_A10G1706;GH_A11G3315;GH_D02G0361;GH_D02G1957;GH_D03G1180;GH_D04G0370;GH_D05G1655;GH_D08G0169;GH_D08G0849;GH_D08G0850;GH_D10G0956;GH_D10G1195;GH_D11G3324;GH_D13G0689
	GO:0033692	cellular polysaccharide biosynthetic process	23	2.63293e-48	1.84305e-47	GH_A02G0335;GH_A03G0761;GH_A03G1797;GH_A04G1249;GH_A05G1624;GH_A05G4004;GH_A08G0161;GH_A08G0841;GH_A10G1004;GH_A10G1706;GH_A11G3315;GH_D02G0361;GH_D02G1957;GH_D03G1180;GH_D04G0370;GH_D05G1655;GH_D08G0169;GH_D08G0849;GH_D08G0850;GH_D10G0956;GH_D10G1195;GH_D11G3324;GH_D13G0689
	GO:0000271	polysaccharide biosynthetic process	23	5.99269e-47	3.59561e-46	GH_A02G0335;GH_A03G0761;GH_A03G1797;GH_A04G1249;GH_A05G1624;GH_A05G4004;GH_A08G0161;GH_A08G0841;GH_A10G1004;GH_A10G1706;GH_A11G3315;GH_D02G0361;GH_D02G1957;GH_D03G1180;GH_D04G0370;GH_D05G1655;GH_D08G0169;GH_D08G0849;GH_D08G0850;GH_D10G0956;GH_D10G1195;GH_D11G3324;GH_D13G0689
	GO:0034637	cellular carbohydrate biosynthetic process	23	3.03288e-46	1.59226e-45	GH_A02G0335;GH_A03G0761;GH_A03G1797;GH_A04G1249;GH_A05G1624;GH_A05G4004;GH_A08G0161;GH_A08G0841;GH_A10G1004;GH_A10G1706;GH_A11G3315;GH_D02G0361;GH_D02G1957;GH_D03G1180;GH_D04G0370;GH_D05G1655;GH_D08G0169;GH_D08G0849;GH_D08G0850;GH_D10G0956;GH_D10G1195;GH_D11G3324;GH_D13G0689
	GO:0006073	cellular glucan metabolic process	23	1.29407e-45	6.03897e-45	GH_A02G0335;GH_A03G0761;GH_A03G1797;GH_A04G1249;GH_A05G1624;GH_A05G4004;GH_A08G0161;GH_A08G0841;GH_A10G1004;GH_A10G1706;GH_A11G3315;GH_D02G0361;GH_D02G1957;GH_D03G1180;GH_D04G0370;GH_D05G1655;GH_D08G0169;GH_D08G0849;GH_D08G0850;GH_D10G0956;GH_D10G1195;GH_D11G3324;GH_D13G0689
	GO:0044042	glucan metabolic process	23	1.46999e-45	6.17396e-45	GH_A02G0335;GH_A03G0761;GH_A03G1797;GH_A04G1249;GH_A05G1624;GH_A05G4004;GH_A08G0161;GH_A08G0841;GH_A10G1004;GH_A10G1706;GH_A11G3315;GH_D02G0361;GH_D02G1957;GH_D03G1180;GH_D04G0370;GH_D05G1655;GH_D08G0169;GH_D08G0849;GH_D08G0850;GH_D10G0956;GH_D10G1195;GH_D11G3324;GH_D13G0689
	GO:0016051	carbohydrate biosynthetic process	23	4.48934e-44	1.71411e-43	GH_A02G0335;GH_A03G0761;GH_A03G1797;GH_A04G1249;GH_A05G1624;GH_A05G4004;GH_A08G0161;GH_A08G0841;GH_A10G1004;GH_A10G1706;GH_A11G3315;GH_D02G0361;GH_D02G1957;GH_D03G1180;GH_D04G0370;GH_D05G1655;GH_D08G0169;GH_D08G0849;GH_D08G0850;GH_D10G0956;GH_D10G1195;GH_D11G3324;GH_D13G0689
	GO:0044264	cellular polysaccharide metabolic process	23	1.5306e-43	5.35708e-43	GH_A02G0335;GH_A03G0761;GH_A03G1797;GH_A04G1249;GH_A05G1624;GH_A05G4004;GH_A08G0161;GH_A08G0841;GH_A10G1004;GH_A10G1706;GH_A11G3315;GH_D02G0361;GH_D02G1957;GH_D03G1180;GH_D04G0370;GH_D05G1655;GH_D08G0169;GH_D08G0849;GH_D08G0850;GH_D10G0956;GH_D10G1195;GH_D11G3324;GH_D13G0689
	GO:0044262	cellular carbohydrate metabolic process	23	9.3104e-40	3.00797e-39	GH_A02G0335;GH_A03G0761;GH_A03G1797;GH_A04G1249;GH_A05G1624;GH_A05G4004;GH_A08G0161;GH_A08G0841;GH_A10G1004;GH_A10G1706;GH_A11G3315;GH_D02G0361;GH_D02G1957;GH_D03G1180;GH_D04G0370;GH_D05G1655;GH_D08G0169;GH_D08G0849;GH_D08G0850;GH_D10G0956;GH_D10G1195;GH_D11G3324;GH_D13G0689
	GO:0005976	polysaccharide metabolic process	23	8.93538e-38	2.68061e-37	GH_A02G0335;GH_A03G0761;GH_A03G1797;GH_A04G1249;GH_A05G1624;GH_A05G4004;GH_A08G0161;GH_A08G0841;GH_A10G1004;GH_A10G1706;GH_A11G3315;GH_D02G0361;GH_D02G1957;GH_D03G1180;GH_D04G0370;GH_D05G1655;GH_D08G0169;GH_D08G0849;GH_D08G0850;GH_D10G0956;GH_D10G1195;GH_D11G3324;GH_D13G0689
	GO:0044723	single-organism carbohydrate metabolic process	23	3.06806e-35	8.59058e-35	GH_A02G0335;GH_A03G0761;GH_A03G1797;GH_A04G1249;GH_A05G1624;GH_A05G4004;GH_A08G0161;GH_A08G0841;GH_A10G1004;GH_A10G1706;GH_A11G3315;GH_D02G0361;GH_D02G1957;GH_D03G1180;GH_D04G0370;GH_D05G1655;GH_D08G0169;GH_D08G0849;GH_D08G0850;GH_D10G0956;GH_D10G1195;GH_D11G3324;GH_D13G0689
	GO:0044711	single-organism biosynthetic process	23	3.48649e-27	9.15203e-27	GH_A02G0335;GH_A03G0761;GH_A03G1797;GH_A04G1249;GH_A05G1624;GH_A05G4004;GH_A08G0161;GH_A08G0841;GH_A10G1004;GH_A10G1706;GH_A11G3315;GH_D02G0361;GH_D02G1957;GH_D03G1180;GH_D04G0370;GH_D05G1655;GH_D08G0169;GH_D08G0849;GH_D08G0850;GH_D10G0956;GH_D10G1195;GH_D11G3324;GH_D13G0689
	GO:0005975	carbohydrate metabolic process	23	5.85923e-27	1.44757e-26	GH_A02G0335;GH_A03G0761;GH_A03G1797;GH_A04G1249;GH_A05G1624;GH_A05G4004;GH_A08G0161;GH_A08G0841;GH_A10G1004;GH_A10G1706;GH_A11G3315;GH_D02G0361;GH_D02G1957;GH_D03G1180;GH_D04G0370;GH_D05G1655;GH_D08G0169;GH_D08G0849;GH_D08G0850;GH_D10G0956;GH_D10G1195;GH_D11G3324;GH_D13G0689
	GO:0034645	cellular macromolecule biosynthetic process	23	3.45831e-17	8.06938e-17	GH_A02G0335;GH_A03G0761;GH_A03G1797;GH_A04G1249;GH_A05G1624;GH_A05G4004;GH_A08G0161;GH_A08G0841;GH_A10G1004;GH_A10G1706;GH_A11G3315;GH_D02G0361;GH_D02G1957;GH_D03G1180;GH_D04G0370;GH_D05G1655;GH_D08G0169;GH_D08G0849;GH_D08G0850;GH_D10G0956;GH_D10G1195;GH_D11G3324;GH_D13G0689
	GO:0009059	macromolecule biosynthetic process	23	5.07116e-17	1.12099e-16	GH_A02G0335;GH_A03G0761;GH_A03G1797;GH_A04G1249;GH_A05G1624;GH_A05G4004;GH_A08G0161;GH_A08G0841;GH_A10G1004;GH_A10G1706;GH_A11G3315;GH_D02G0361;GH_D02G1957;GH_D03G1180;GH_D04G0370;GH_D05G1655;GH_D08G0169;GH_D08G0849;GH_D08G0850;GH_D10G0956;GH_D10G1195;GH_D11G3324;GH_D13G0689
	GO:0044249	cellular biosynthetic process	23	1.71222e-14	3.59565e-14	GH_A02G0335;GH_A03G0761;GH_A03G1797;GH_A04G1249;GH_A05G1624;GH_A05G4004;GH_A08G0161;GH_A08G0841;GH_A10G1004;GH_A10G1706;GH_A11G3315;GH_D02G0361;GH_D02G1957;GH_D03G1180;GH_D04G0370;GH_D05G1655;GH_D08G0169;GH_D08G0849;GH_D08G0850;GH_D10G0956;GH_D10G1195;GH_D11G3324;GH_D13G0689
	GO:1901576	organic substance biosynthetic process	23	2.42671e-14	4.85341e-14	GH_A02G0335;GH_A03G0761;GH_A03G1797;GH_A04G1249;GH_A05G1624;GH_A05G4004;GH_A08G0161;GH_A08G0841;GH_A10G1004;GH_A10G1706;GH_A11G3315;GH_D02G0361;GH_D02G1957;GH_D03G1180;GH_D04G0370;GH_D05G1655;GH_D08G0169;GH_D08G0849;GH_D08G0850;GH_D10G0956;GH_D10G1195;GH_D11G3324;GH_D13G0689
	GO:0044710	single-organism metabolic process	23	4.32908e-14	8.26461e-14	GH_A02G0335;GH_A03G0761;GH_A03G1797;GH_A04G1249;GH_A05G1624;GH_A05G4004;GH_A08G0161;GH_A08G0841;GH_A10G1004;GH_A10G1706;GH_A11G3315;GH_D02G0361;GH_D02G1957;GH_D03G1180;GH_D04G0370;GH_D05G1655;GH_D08G0169;GH_D08G0849;GH_D08G0850;GH_D10G0956;GH_D10G1195;GH_D11G3324;GH_D13G0689
	GO:0009058	biosynthetic process	23	7.35525e-14	1.34313e-13	GH_A02G0335;GH_A03G0761;GH_A03G1797;GH_A04G1249;GH_A05G1624;GH_A05G4004;GH_A08G0161;GH_A08G0841;GH_A10G1004;GH_A10G1706;GH_A11G3315;GH_D02G0361;GH_D02G1957;GH_D03G1180;GH_D04G0370;GH_D05G1655;GH_D08G0169;GH_D08G0849;GH_D08G0850;GH_D10G0956;GH_D10G1195;GH_D11G3324;GH_D13G0689
	GO:0044763	single-organism cellular process	23	7.24644e-12	1.26813e-11	GH_A02G0335;GH_A03G0761;GH_A03G1797;GH_A04G1249;GH_A05G1624;GH_A05G4004;GH_A08G0161;GH_A08G0841;GH_A10G1004;GH_A10G1706;GH_A11G3315;GH_D02G0361;GH_D02G1957;GH_D03G1180;GH_D04G0370;GH_D05G1655;GH_D08G0169;GH_D08G0849;GH_D08G0850;GH_D10G0956;GH_D10G1195;GH_D11G3324;GH_D13G0689
	GO:0044260	cellular macromolecule metabolic process	23	4.76238e-10	8.0008e-10	GH_A02G0335;GH_A03G0761;GH_A03G1797;GH_A04G1249;GH_A05G1624;GH_A05G4004;GH_A08G0161;GH_A08G0841;GH_A10G1004;GH_A10G1706;GH_A11G3315;GH_D02G0361;GH_D02G1957;GH_D03G1180;GH_D04G0370;GH_D05G1655;GH_D08G0169;GH_D08G0849;GH_D08G0850;GH_D10G0956;GH_D10G1195;GH_D11G3324;GH_D13G0689
	GO:0043170	macromolecule metabolic process	23	7.46869e-09	1.20648e-08	GH_A02G0335;GH_A03G0761;GH_A03G1797;GH_A04G1249;GH_A05G1624;GH_A05G4004;GH_A08G0161;GH_A08G0841;GH_A10G1004;GH_A10G1706;GH_A11G3315;GH_D02G0361;GH_D02G1957;GH_D03G1180;GH_D04G0370;GH_D05G1655;GH_D08G0169;GH_D08G0849;GH_D08G0850;GH_D10G0956;GH_D10G1195;GH_D11G3324;GH_D13G0689
	GO:0044699	single-organism process	23	4.82421e-08	7.50432e-08	GH_A02G0335;GH_A03G0761;GH_A03G1797;GH_A04G1249;GH_A05G1624;GH_A05G4004;GH_A08G0161;GH_A08G0841;GH_A10G1004;GH_A10G1706;GH_A11G3315;GH_D02G0361;GH_D02G1957;GH_D03G1180;GH_D04G0370;GH_D05G1655;GH_D08G0169;GH_D08G0849;GH_D08G0850;GH_D10G0956;GH_D10G1195;GH_D11G3324;GH_D13G0689
	GO:0044237	cellular metabolic process	23	5.01603e-07	7.52404e-07	GH_A02G0335;GH_A03G0761;GH_A03G1797;GH_A04G1249;GH_A05G1624;GH_A05G4004;GH_A08G0161;GH_A08G0841;GH_A10G1004;GH_A10G1706;GH_A11G3315;GH_D02G0361;GH_D02G1957;GH_D03G1180;GH_D04G0370;GH_D05G1655;GH_D08G0169;GH_D08G0849;GH_D08G0850;GH_D10G0956;GH_D10G1195;GH_D11G3324;GH_D13G0689
	GO:0044238	primary metabolic process	23	1.64022e-06	2.37549e-06	GH_A02G0335;GH_A03G0761;GH_A03G1797;GH_A04G1249;GH_A05G1624;GH_A05G4004;GH_A08G0161;GH_A08G0841;GH_A10G1004;GH_A10G1706;GH_A11G3315;GH_D02G0361;GH_D02G1957;GH_D03G1180;GH_D04G0370;GH_D05G1655;GH_D08G0169;GH_D08G0849;GH_D08G0850;GH_D10G0956;GH_D10G1195;GH_D11G3324;GH_D13G0689
	GO:0071704	organic substance metabolic process	23	4.68212e-06	6.55497e-06	GH_A02G0335;GH_A03G0761;GH_A03G1797;GH_A04G1249;GH_A05G1624;GH_A05G4004;GH_A08G0161;GH_A08G0841;GH_A10G1004;GH_A10G1706;GH_A11G3315;GH_D02G0361;GH_D02G1957;GH_D03G1180;GH_D04G0370;GH_D05G1655;GH_D08G0169;GH_D08G0849;GH_D08G0850;GH_D10G0956;GH_D10G1195;GH_D11G3324;GH_D13G0689
	GO:0009987	cellular process	23	0.000347628	0.000470979	GH_A02G0335;GH_A03G0761;GH_A03G1797;GH_A04G1249;GH_A05G1624;GH_A05G4004;GH_A08G0161;GH_A08G0841;GH_A10G1004;GH_A10G1706;GH_A11G3315;GH_D02G0361;GH_D02G1957;GH_D03G1180;GH_D04G0370;GH_D05G1655;GH_D08G0169;GH_D08G0849;GH_D08G0850;GH_D10G0956;GH_D10G1195;GH_D11G3324;GH_D13G0689
	GO:0008152	metabolic process	23	0.00154188	0.00202371	GH_A02G0335;GH_A03G0761;GH_A03G1797;GH_A04G1249;GH_A05G1624;GH_A05G4004;GH_A08G0161;GH_A08G0841;GH_A10G1004;GH_A10G1706;GH_A11G3315;GH_D02G0361;GH_D02G1957;GH_D03G1180;GH_D04G0370;GH_D05G1655;GH_D08G0169;GH_D08G0849;GH_D08G0850;GH_D10G0956;GH_D10G1195;GH_D11G3324;GH_D13G0689
	GO:0009555	pollen development	2	0.0132216	0.0168275	GH_A05G1624;GH_D05G1655
	GO:0048229	gametophyte development	2	0.0253524	0.0313176	GH_A05G1624;GH_D05G1655
