# Supplementary material for: Genome-wide analysis of the CalS gene family in cotton reveals their potential roles in fiber development and responses to stress
Source: PeerJ. 2021 Nov 30;9:e12557. doi: 10.7717/peerj.12557 (PMC8641485; doi:10.7717/peerj.12557)
Supplement: Supplemental Information 8 [file peerj-09-12557-s008.xlsx]

## Sheet: GHCalS4-Fiber
Sample Name	Target Name	Cт
CCRI45-5d	GhCalS4	26.7412
CCRI45-5d	GhCalS4	26.8395
CCRI45-5d	GhCalS4	26.9217
CCRI45-5d	Actin	19.4594
CCRI45-5d	Actin	19.5339
CCRI45-5d	Actin	19.433
CCRI45-7d	GhCalS4	24.9574
CCRI45-7d	GhCalS4	24.9733
CCRI45-7d	GhCalS4	25.1021
CCRI45-7d	Actin	18.9833
CCRI45-7d	Actin	18.969
CCRI45-7d	Actin	19.0515
CCRI45-10d	GhCalS4	22.5143
CCRI45-10d	GhCalS4	22.5388
CCRI45-10d	GhCalS4	22.7835
CCRI45-10d	Actin	18.2007
CCRI45-10d	Actin	18.2861
CCRI45-10d	Actin	18.1906
CCRI45-15d	GhCalS4	23.3756
CCRI45-15d	GhCalS4	23.8136
CCRI45-15d	GhCalS4	23.9226
CCRI45-15d	Actin	19.8811
CCRI45-15d	Actin	19.9792
CCRI45-15d	Actin	20.094
CCRI45-20d	GhCalS4	22.4707
CCRI45-20d	GhCalS4	22.7421
CCRI45-20d	GhCalS4	22.9085
CCRI45-20d	Actin	19.3503
CCRI45-20d	Actin	19.4733
CCRI45-20d	Actin	19.5684
CCRI45-25d	GhCalS4	22.7918
CCRI45-25d	GhCalS4	23.0825
CCRI45-25d	GhCalS4	23.2615
CCRI45-25d	Actin	20.285
CCRI45-25d	Actin	20.0795
CCRI45-25d	Actin	19.8977
MBI7747-5d	GhCalS4	26.9479
MBI7747-5d	GhCalS4	27.6343
MBI7747-5d	GhCalS4	27.1862
MBI7747-5d	Actin	19.6174
MBI7747-5d	Actin	19.5761
MBI7747-5d	Actin	19.2539
MBI7747-7d	GhCalS4	25.4627
MBI7747-7d	GhCalS4	25.1184
MBI7747-7d	GhCalS4	25.1966
MBI7747-7d	Actin	19.5616
MBI7747-7d	Actin	19.6004
MBI7747-7d	Actin	19.5614
MBI7747-10d	GhCalS4	22.7116
MBI7747-10d	GhCalS4	22.8908
MBI7747-10d	GhCalS4	23.1103
MBI7747-10d	Actin	17.9314
MBI7747-10d	Actin	18.2584
MBI7747-10d	Actin	18.2908
MBI7747-15d	GhCalS4	23.4708
MBI7747-15d	GhCalS4	23.6388
MBI7747-15d	GhCalS4	23.4092
MBI7747-15d	Actin	19.4142
MBI7747-15d	Actin	19.4593
MBI7747-15d	Actin	19.3026
MBI7747-20d	GhCalS4	22.765
MBI7747-20d	GhCalS4	23.0298
MBI7747-20d	GhCalS4	23.0455
MBI7747-20d	Actin	19.2446
MBI7747-20d	Actin	19.6639
MBI7747-20d	Actin	20.0322
MBI7747-25d	GhCalS4	22.5981
MBI7747-25d	GhCalS4	22.7086
MBI7747-25d	GhCalS4	22.2771
MBI7747-25d	Actin	19.9685
MBI7747-25d	Actin	20.0999
MBI7747-25d	Actin	20.0587

## Sheet: GHCalS2-PEG
Sample Name	Target Name	Cт
0	GhCalS2	25.0554
0	GhCalS2	25.6419
0	GhCalS2	25.9308
1	GhCalS2	24.2294
1	GhCalS2	24.8544
1	GhCalS2	24.7773
3	GhCalS2	25.4745
3	GhCalS2	25.1317
3	GhCalS2	23.9621
6	GhCalS2	23.9546
6	GhCalS2	24.4655
6	GhCalS2	24.4745
12	GhCalS2	25.0004
12	GhCalS2	25.2289
12	GhCalS2	25.2575
24	GhCalS2	23.8914
24	GhCalS2	23.7762
24	GhCalS2	24.2266
0	Actin	21.0088
0	Actin	20.8921
0	Actin	20.7383
1	Actin	21.0566
1	Actin	20.9289
1	Actin	20.2935
3	Actin	21.8743
3	Actin	21.7383
3	Actin	21.7353
6	Actin	20.7918
6	Actin	20.2234
6	Actin	20.0997
12	Actin	20.2678
12	Actin	20.1392
12	Actin	20.1336
24	Actin	21.3065
24	Actin	20.8592
24	Actin	20.5092

## Sheet: GHCalS3-PEG
Sample Name	Target Name	Cт
0	GhCalS3	26.6592
0	GhCalS3	27.296
0	GhCalS3	26.9287
1	GhCalS3	26.6711
1	GhCalS3	25.9306
1	GhCalS3	25.7858
3	GhCalS3	25.7743
3	GhCalS3	25.8226
3	GhCalS3	25.746
6	GhCalS3	26.8505
6	GhCalS3	26.5689
6	GhCalS3	26.6139
12	GhCalS3	25.6703
12	GhCalS3	25.6392
12	GhCalS3	25.3232
24	GhCalS3	25.6661
24	GhCalS3	25.4927
24	GhCalS3	25.654
0	Actin	20.0621
0	Actin	19.8819
0	Actin	19.5185
1	Actin	19.9166
1	Actin	19.5953
1	Actin	19.7141
3	Actin	19.9289
3	Actin	19.7317
3	Actin	19.8401
6	Actin	19.9668
6	Actin	19.9315
6	Actin	19.8677
12	Actin	19.358
12	Actin	19.8028
12	Actin	19.5011
24	Actin	20.4252
24	Actin	20.1798
24	Actin	20.016

## Sheet: GHCalS6-PEG
Sample Name	Target Name	Cт
0	GhCalS6	29.9628
0	GhCalS6	29.9911
0	GhCalS6	28.5063
1	GhCalS6	28.8525
1	GhCalS6	28.4132
1	GhCalS6	28.3964
3	GhCalS6	27.3783
3	GhCalS6	27.1891
3	GhCalS6	27.1967
6	GhCalS6	27.9982
6	GhCalS6	28.1737
6	GhCalS6	27.9222
12	GhCalS6	27.2528
12	GhCalS6	27.0937
12	GhCalS6	27.2554
24	GhCalS6	26.463
24	GhCalS6	26.5975
24	GhCalS6	26.5763
0	Actin	20.0621
0	Actin	19.8819
0	Actin	19.5185
1	Actin	19.9166
1	Actin	19.5953
1	Actin	19.7141
3	Actin	19.9289
3	Actin	19.7317
3	Actin	19.8401
6	Actin	19.9668
6	Actin	19.9315
6	Actin	19.8677
12	Actin	19.358
12	Actin	19.8028
12	Actin	19.5011
24	Actin	20.4252
24	Actin	20.1798
24	Actin	20.016

## Sheet: GHCalS9-PEG
Sample Name	Target Name	Cт
0	GhCalS9	25.4385
0	GhCalS9	25.9772
0	GhCalS9	26.0005
1	GhCalS9	25.2325
1	GhCalS9	25.1329
1	GhCalS9	25.1679
3	GhCalS9	25.937
3	GhCalS9	25.9782
3	GhCalS9	25.9487
6	GhCalS9	26.4545
6	GhCalS9	26.6997
6	GhCalS9	26.9329
12	GhCalS9	26.1116
12	GhCalS9	26.0525
12	GhCalS9	26.1607
24	GhCalS9	25.3745
24	GhCalS9	25.6592
24	GhCalS9	25.6751
0	Actin	20.0621
0	Actin	19.8819
0	Actin	19.5185
1	Actin	19.9166
1	Actin	19.5953
1	Actin	19.7141
3	Actin	19.9289
3	Actin	19.7317
3	Actin	19.8401
6	Actin	19.9668
6	Actin	19.9315
6	Actin	19.8677
12	Actin	19.358
12	Actin	19.8028
12	Actin	19.5011
24	Actin	20.4252
24	Actin	20.1798
24	Actin	20.016

## Sheet: GHCalS16-PEG
Sample Name	Target Name	Cт
0	GhCalS16	29.8795
0	GhCalS16	29.688
0	GhCalS16	29.9202
1	GhCalS16	28.5668
1	GhCalS16	28.9405
1	GhCalS16	28.6543
3	GhCalS16	29.3268
3	GhCalS16	29.375
3	GhCalS16	29.4667
6	GhCalS16	29.8966
6	GhCalS16	29.8623
6	GhCalS16	29.874
12	GhCalS16	29.9697
12	GhCalS16	29.8876
12	GhCalS16	29.6235
24	GhCalS16	28.3055
24	GhCalS16	28.3532
24	GhCalS16	28.6194
0	Actin	21.0088
0	Actin	20.8921
0	Actin	20.7383
1	Actin	21.0566
1	Actin	20.9289
1	Actin	20.2935
3	Actin	21.8743
3	Actin	21.7383
3	Actin	21.7353
6	Actin	20.7918
6	Actin	20.2234
6	Actin	20.0997
12	Actin	20.2678
12	Actin	20.1392
12	Actin	20.1336
24	Actin	21.3065
24	Actin	20.8592
24	Actin	20.5092

## Sheet: GHCalS2-Nacl
Sample Name	Target Name	Cт
0	GhCalS2	26.0298
0	GhCalS2	25.8696
0	GhCalS2	25.9227
1	GhCalS2	26.5984
1	GhCalS2	26.3989
1	GhCalS2	26.6575
3	GhCalS2	25.8183
3	GhCalS2	25.7562
3	GhCalS2	25.9344
6	GhCalS2	23.1087
6	GhCalS2	23.2509
6	GhCalS2	23.2413
12	GhCalS2	23.2079
12	GhCalS2	23.8867
12	GhCalS2	23.8335
24	GhCalS2	25.1987
24	GhCalS2	25.2598
24	GhCalS2	25.4953
0	ACTIN	22.9303
0	ACTIN	21.845
0	ACTIN	22.3445
1	ACTIN	22.2473
1	ACTIN	22.3362
1	ACTIN	21.9695
3	ACTIN	21.3828
3	ACTIN	21.4321
3	ACTIN	19.9402
6	ACTIN	18.9778
6	ACTIN	19.2801
6	ACTIN	18.9854
12	ACTIN	19.2231
12	ACTIN	19.2217
12	ACTIN	19.2568
24	ACTIN	20.083
24	ACTIN	19.936
24	ACTIN	19.8478

## Sheet: GHCalS3-Nacl
Sample Name	Target Name	Cт
0	GhCalS3	30.6923
0	GhCalS3	28.7645
0	GhCalS3	29.9325
1	GhCalS3	27.7616
1	GhCalS3	27.3028
1	GhCalS3	27.2551
3	GhCalS3	26.0395
3	GhCalS3	25.7531
3	GhCalS3	26.5532
6	GhCalS3	24.6068
6	GhCalS3	25.1628
6	GhCalS3	25.3476
12	GhCalS3	24.5664
12	GhCalS3	24.9597
12	GhCalS3	25.1214
24	GhCalS3	26.0457
24	GhCalS3	25.9789
24	GhCalS3	25.9615
0	ACTIN	22.9303
0	ACTIN	21.845
0	ACTIN	22.3445
1	ACTIN	22.2473
1	ACTIN	22.3362
1	ACTIN	21.9695
3	ACTIN	21.3828
3	ACTIN	21.4321
3	ACTIN	19.9402
6	ACTIN	18.9778
6	ACTIN	19.2801
6	ACTIN	18.9854
12	ACTIN	19.2231
12	ACTIN	19.2217
12	ACTIN	19.2568
24	ACTIN	20.083
24	ACTIN	19.936
24	ACTIN	19.8478

## Sheet: GHCalS6-Nacl
Sample Name	Target Name	Cт
0	GhCalS6	29.7504
0	GhCalS6	29.915
0	GhCalS6	29.7636
1	GhCalS6	30.9341
1	GhCalS6	30.207
1	GhCalS6	30.4011
3	GhCalS6	29.896
3	GhCalS6	29.715
3	GhCalS6	28.2789
6	GhCalS6	26.6094
6	GhCalS6	26.592
6	GhCalS6	26.593
12	GhCalS6	26.3334
12	GhCalS6	26.707
12	GhCalS6	26.3282
24	GhCalS6	28.2721
24	GhCalS6	28.2303
24	GhCalS6	28.1164
0	ACTIN	22.9303
0	ACTIN	21.845
0	ACTIN	22.3445
1	ACTIN	22.2473
1	ACTIN	22.3362
1	ACTIN	21.9695
3	ACTIN	21.3828
3	ACTIN	21.4321
3	ACTIN	19.9402
6	ACTIN	18.9778
6	ACTIN	19.2801
6	ACTIN	18.9854
12	ACTIN	19.2231
12	ACTIN	19.2217
12	ACTIN	19.2568
24	ACTIN	20.083
24	ACTIN	19.936
24	ACTIN	19.8478

## Sheet: GHCalS9-Nacl
Sample Name	Target Name	Cт
0	GhCalS9	26.1125
0	GhCalS9	25.566
0	GhCalS9	24.8179
1	GhCalS9	25.9556
1	GhCalS9	25.4491
1	GhCalS9	25.6902
3	GhCalS9	24.2598
3	GhCalS9	24.0476
3	GhCalS9	24.0702
6	GhCalS9	23.9787
6	GhCalS9	23.9237
6	GhCalS9	24.1219
12	GhCalS9	23.3453
12	GhCalS9	23.1143
12	GhCalS9	23.3038
24	GhCalS9	24.7869
24	GhCalS9	24.7809
24	GhCalS9	24.9584
0	ACTIN	21.157
0	ACTIN	21.1166
0	ACTIN	21.0247
1	ACTIN	21.2576
1	ACTIN	21.203
1	ACTIN	20.9579
3	ACTIN	19.6372
3	ACTIN	19.4857
3	ACTIN	19.1752
6	ACTIN	19.7101
6	ACTIN	19.9843
6	ACTIN	19.7318
12	ACTIN	19.5467
12	ACTIN	19.2985
12	ACTIN	18.859
24	ACTIN	19.9269
24	ACTIN	19.771
24	ACTIN	19.7683

[truncated: 1 more sheets: GHCalS16-Nacl]
